# Supplementary material for: Loss of Wwox drives metastasis in triple-negative breast cancer by JAK2/STAT3 axis
Source: PubMed Central journal article supplement (PMC6113304; doi:10.1038/s41467-018-05852-8), 2018-08-28
Supplement: 41467_2018_5852_MOESM2_ESM.pdf [file 41467_2018_5852_MOESM2_ESM.pdf]

## **Description of Additional Supplementary Files**

File Name: Supplementary Data 1

Description: Clinical summary of three validated cohorts of breast cancer patients
